# Supplementary material for: Integrative Molecular Analyses of an Individual Transcription Factor-Based Genomic Model for Lung Cancer Prognosis
Source: Hindawi journal article supplement (doi:10.1155/2021/5125643), 2021-12-07
Supplement: f2 [file 5125643.f2.pdf]

Supplementary table 2. The gene sets of TFs.

AC008770.3

AC023509.3

AC092835.1

AC138696.1

ADNP

ADNP2

AEBP1

AEBP2

AHCTF1

AHDC1

AHR

AHRR

AIRE

AKAP8

AKAP8L

AKNA

ALX1

ALX3

ALX4

ANHX

ANKZF1

AR

ARGFX

ARHGAP35

ARID2

ARID3A

ARID3B

ARID3C

ARID5A

ARID5B

ARNT

ARNT2

ARNTL

ARNTL2

ARX

ASCL1

ASCL2

ASCL3

ASCL4

ASCL5

ASH1L

ATF1

ATF2

ATF3

ATF4

ATF5

ATF6

ATF6B

ATF7

ATMIN

ATOH1

ATOH7

ATOH8  
BACH1  
BACH2  
BARHL1  
BARHL2  
BARX1  
BARX2  
BATF  
BATF2  
BATF3  
BAZ2A  
BAZ2B  
BBX  
BCL11A  
BCL11B  
BCL6  
BCL6B  
BHLHA15  
BHLHA9  
BHLHE22  
BHLHE23  
BHLHE40  
BHLHE41  
BNC1  
BNC2  
BORCS8-MEF2B  
BPTF  
BRF2  
BSX  
C11orf95  
CAMTA1  
CAMTA2  
CARF  
CASZ1  
CBX2  
CC2D1A  
CCDC169-SOHLH2  
CCDC17  
CDC5L  
CDX1  
CDX2  
CDX4  
CEBPA  
CEBPB  
CEBPD  
CEBPE  
CEBPG  
CEBPZ  
CENPA  
CENPB  
CENPBD1  
CENPS  
CENPT

CENPX  
CGGBP1  
CHAMP1  
CHCHD3  
CIC  
CLOCK  
CPEB1  
CPXCR1  
CREB1  
CREB3  
CREB3L1  
CREB3L2  
CREB3L3  
CREB3L4  
CREB5  
CREBL2  
CREBZF  
CREM  
CRX  
CSRNP1  
CSRNP2  
CSRNP3  
CTCF  
CTCFL  
CUX1  
CUX2  
CXXC1  
CXXC4  
CXXC5  
DACH1  
DACH2  
DBP  
DBX1  
DBX2  
DDIT3  
DEAF1  
DLX1  
DLX2  
DLX3  
DLX4  
DLX5  
DLX6  
DMBX1  
DMRT1  
DMRT2  
DMRT3  
DMRTA1  
DMRTA2  
DMRTB1  
DMRTC2  
DMTF1  
DNMT1  
DNTTIP1

DOT1L  
DPF1  
DPF3  
DPRX  
DR1  
DRAP1  
DRGX  
DUX1  
DUX3  
DUX4  
DUXA  
DZIP1  
E2F1  
E2F2  
E2F3  
E2F4  
E2F5  
E2F6  
E2F7  
E2F8  
E4F1  
EBF1  
EBF2  
EBF3  
EBF4  
EEA1  
EGR1  
EGR2  
EGR3  
EGR4  
EHF  
ELF1  
ELF2  
ELF3  
ELF4  
ELF5  
ELK1  
ELK3  
ELK4  
EMX1  
EMX2  
EN1  
EN2  
EOMES  
EPAS1  
ERF  
ERG  
ESR1  
ESR2  
ESRRA  
ESRRB  
ESRRG  
ESX1

ETS1  
ETS2  
ETV1  
ETV2  
ETV3  
ETV3L  
ETV4  
ETV5  
ETV6  
ETV7  
EVX1  
EVX2  
FAM170A  
FAM200B  
FBXL19  
FERD3L  
FEV  
FEZF1  
FEZF2  
FIGLA  
FIZ1  
FLI1  
FLYWCH1  
FOS  
FOSB  
FOSL1  
FOSL2  
FOXA1  
FOXA2  
FOXA3  
FOXB1  
FOXB2  
FOXC1  
FOXC2  
FOXD1  
FOXD2  
FOXD3  
FOXD4  
FOXD4L1  
FOXD4L3  
FOXD4L4  
FOXD4L5  
FOXD4L6  
FOXE1  
FOXE3  
FOXF1  
FOXF2  
FOXG1  
FOXH1  
FOXII  
FOXI2  
FOXI3  
FOXJ1

FOXJ2  
FOXJ3  
FOXK1  
FOXK2  
FOXL1  
FOXL2  
FOXM1  
FOXN1  
FOXN2  
FOXN3  
FOXN4  
FOXO1  
FOXO3  
FOXO4  
FOXO6  
FOXP1  
FOXP2  
FOXP3  
FOXP4  
FOXQ1  
FOXR1  
FOXR2  
FOXS1  
GABPA  
GATA1  
GATA2  
GATA3  
GATA4  
GATA5  
GATA6  
GATAD2A  
GATAD2B  
GBX1  
GBX2  
GCM1  
GCM2  
GFI1  
GFI1B  
GLI1  
GLI2  
GLI3  
GLI4  
GLIS1  
GLIS2  
GLIS3  
GLMP  
GLYR1  
GMEB1  
GMEB2  
GPBP1  
GPBP1L1  
GRHL1  
GRHL2

GRHL3  
GSC  
GSC2  
GSX1  
GSX2  
GTF2B  
GTF2I  
GTF2IRD1  
GTF2IRD2  
GTF2IRD2B  
GTF3A  
GZF1  
HAND1  
HAND2  
HBP1  
HDX  
HELT  
HES1  
HES2  
HES3  
HES4  
HES5  
HES6  
HES7  
HESX1  
HEY1  
HEY2  
HEYL  
HHEX  
HIC1  
HIC2  
HIF1A  
HIF3A  
HINFP  
HIVEP1  
HIVEP2  
HIVEP3  
HKR1  
HLF  
HLX  
HMBOX1  
HMG20A  
HMG20B  
HMGA1  
HMGA2  
HMGN3  
HMX1  
HMX2  
HMX3  
HNF1A  
HNF1B  
HNF4A  
HNF4G

HOMEZ  
HOXA1  
HOXA10  
HOXA11  
HOXA13  
HOXA2  
HOXA3  
HOXA4  
HOXA5  
HOXA6  
HOXA7  
HOXA9  
HOXB1  
HOXB13  
HOXB2  
HOXB3  
HOXB4  
HOXB5  
HOXB6  
HOXB7  
HOXB8  
HOXB9  
HOXC10  
HOXC11  
HOXC12  
HOXC13  
HOXC4  
HOXC5  
HOXC6  
HOXC8  
HOXC9  
HOXD1  
HOXD10  
HOXD11  
HOXD12  
HOXD13  
HOXD3  
HOXD4  
HOXD8  
HOXD9  
HSF1  
HSF2  
HSF4  
HSF5  
HSFX1  
HSFX2  
HSFY1  
HSFY2  
IKZF1  
IKZF2  
IKZF3  
IKZF4  
IKZF5



INSM1  
INSM2  
IRF1  
IRF2  
IRF3  
IRF4  
IRF5  
IRF6  
IRF7  
IRF8  
IRF9  
IRX1  
IRX2  
IRX3  
IRX4  
IRX5  
IRX6  
ISL1  
ISL2  
ISX  
JAZF1  
JDP2  
JRK  
JRKL  
JUN  
JUNB  
JUND  
KAT7  
KCMF1  
KCNIP3  
KDM2A  
KDM2B  
KDM5B  
KIN  
KLF1  
KLF10  
KLF11  
KLF12  
KLF13  
KLF14  
KLF15  
KLF16  
KLF17  
KLF2  
KLF3  
KLF4  
KLF5  
KLF6  
KLF7  
KLF8  
KLF9  
KMT2A  
KMT2B

L3MBTL1  
L3MBTL3  
L3MBTL4  
LBX1  
LBX2  
LCOR  
LCORL  
LEF1  
LEUTX  
LHX1  
LHX2  
LHX3  
LHX4  
LHX5  
LHX6  
LHX8  
LHX9  
LIN28A  
LIN28B  
LIN54  
LMX1A  
LMX1B  
LTF  
LYL1  
MAF  
MAFA  
MAFB  
MAFF  
MAFG  
MAFK  
MAX  
MAZ  
MBD1  
MBD2  
MBD3  
MBD4  
MBD6  
MBNL2  
MECOM  
MECP2  
MEF2A  
MEF2B  
MEF2C  
MEF2D  
MEIS1  
MEIS2  
MEIS3  
MEOX1  
MEOX2  
MESP1  
MESP2  
MGA  
MITF

MIXL1  
MKX  
MLX  
MLXIP  
MLXIPL  
MNT  
MNX1  
MSANTD1  
MSANTD3  
MSANTD4  
MSC  
MSGN1  
MSX1  
MSX2  
MTERF1  
MTERF2  
MTERF3  
MTERF4  
MTF1  
MTF2  
MXD1  
MXD3  
MXD4  
MXI1  
MYB  
MYBL1  
MYBL2  
MYC  
MYCL  
MYCN  
MYF5  
MYF6  
MYNN  
MYOD1  
MYOG  
MYPOP  
MYRF  
MYRFL  
MYSM1  
MYT1  
MYT1L  
MZF1  
NACC2  
NAIF1  
NANOG  
NANOGNB  
NANOGP8  
NCOA1  
NCOA2  
NCOA3  
NEUROD1  
NEUROD2  
NEUROD4

NEUROD6  
NEUROG1  
NEUROG2  
NEUROG3  
NFAT5  
NFATC1  
NFATC2  
NFATC3  
NFATC4  
NFE2  
NFE2L1  
NFE2L2  
NFE2L3  
NFE4  
NFIA  
NFIB  
NFIC  
NFIL3  
NFI  
NFKB1  
NFKB2  
NFX1  
NFXL1  
NFYA  
NFYB  
NFYC  
NHLH1  
NHLH2  
NKRF  
NKX1-1  
NKX1-2  
NKX2-1  
NKX2-2  
NKX2-3  
NKX2-4  
NKX2-5  
NKX2-6  
NKX2-8  
NKX3-1  
NKX3-2  
NKX6-1  
NKX6-2  
NKX6-3  
NME2  
NOBOX  
NOTO  
NPAS1  
NPAS2  
NPAS3  
NPAS4  
NR0B1  
NR1D1  
NR1D2

NR1H2  
NR1H3  
NR1H4  
NR1I2  
NR1I3  
NR2C1  
NR2C2  
NR2E1  
NR2E3  
NR2F1  
NR2F2  
NR2F6  
NR3C1  
NR3C2  
NR4A1  
NR4A2  
NR4A3  
NR5A1  
NR5A2  
NR6A1  
NRF1  
NRL  
OLIG1  
OLIG2  
OLIG3  
ONECUT1  
ONECUT2  
ONECUT3  
OSR1  
OSR2  
OTP  
OTX1  
OTX2  
OVOL1  
OVOL2  
OVOL3  
PA2G4  
PATZ1  
PAX1  
PAX2  
PAX3  
PAX4  
PAX5  
PAX6  
PAX7  
PAX8  
PAX9  
PBX1  
PBX2  
PBX3  
PBX4  
PCGF2  
PCGF6

PDX1  
PEG3  
PGR  
PHF1  
PHF19  
PHF20  
PHF21A  
PHOX2A  
PHOX2B  
PIN1  
PITX1  
PITX2  
PITX3  
PKNOX1  
PKNOX2  
PLAG1  
PLAGL1  
PLAGL2  
PLSCR1  
POGK  
POU1F1  
POU2AF1  
POU2F1  
POU2F2  
POU2F3  
POU3F1  
POU3F2  
POU3F3  
POU3F4  
POU4F1  
POU4F2  
POU4F3  
POU5F1  
POU5F1B  
POU5F2  
POU6F1  
POU6F2  
PPARA  
PPARD  
PPARG  
PRDM1  
PRDM10  
PRDM12  
PRDM13  
PRDM14  
PRDM15  
PRDM16  
PRDM2  
PRDM4  
PRDM5  
PRDM6  
PRDM8  
PRDM9

PREB  
PRMT3  
PROP1  
PROX1  
PROX2  
PRR12  
PRRX1  
PRRX2  
PTF1A  
PURA  
PURB  
PURG  
RAG1  
RARA  
RARB  
RARG  
RAX  
RAX2  
RBAK  
RBCK1  
RBPJ  
RBPJL  
RBSN  
REL  
RELA  
RELB  
REPIN1  
REST  
REXO4  
RFX1  
RFX2  
RFX3  
RFX4  
RFX5  
RFX6  
RFX7  
RFX8  
RHOXF1  
RHOXF2  
RHOXF2B  
RLF  
RORA  
RORB  
RORC  
RREB1  
RUNX1  
RUNX2  
RUNX3  
RXRA  
RXRB  
RXRG  
SAFB  
SAFB2

SALL1  
SALL2  
SALL3  
SALL4  
SATB1  
SATB2  
SCMH1  
SCML4  
SCRT1  
SCRT2  
SCX  
SEBOX  
SETBP1  
SETDB1  
SETDB2  
SGSM2  
SHOX  
SHOX2  
SIM1  
SIM2  
SIX1  
SIX2  
SIX3  
SIX4  
SIX5  
SIX6  
SKI  
SKIL  
SKOR1  
SKOR2  
SLC2A4RG  
SMAD1  
SMAD3  
SMAD4  
SMAD5  
SMAD9  
SMYD3  
SNAI1  
SNAI2  
SNAI3  
SNAPC2  
SNAPC4  
SNAPC5  
SOHLH1  
SOHLH2  
SON  
SOX1  
SOX10  
SOX11  
SOX12  
SOX13  
SOX14  
SOX15



SOX17  
SOX18  
SOX2  
SOX21  
SOX3  
SOX30  
SOX4  
SOX5  
SOX6  
SOX7  
SOX8  
SOX9  
SP1  
SP100  
SP110  
SP140  
SP140L  
SP2  
SP3  
SP4  
SP5  
SP6  
SP7  
SP8  
SP9  
SPDEF  
SPEN  
SPI1  
SPIB  
SPIC  
SPZ1  
SRCAP  
SREBF1  
SREBF2  
SRF  
SRY  
ST18  
STAT1  
STAT2  
STAT3  
STAT4  
STAT5A  
STAT5B  
STAT6  
T  
TAL1  
TAL2  
TBP  
TBPL1  
TBPL2  
TBR1  
TBX1  
TBX10

TBX15  
TBX18  
TBX19  
TBX2  
TBX20  
TBX21  
TBX22  
TBX3  
TBX4  
TBX5  
TBX6  
TCF12  
TCF15  
TCF20  
TCF21  
TCF23  
TCF24  
TCF3  
TCF4  
TCF7  
TCF7L1  
TCF7L2  
TCFL5  
TEAD1  
TEAD2  
TEAD3  
TEAD4  
TEF  
TERB1  
TERF1  
TERF2  
TET1  
TET2  
TET3  
TFAP2A  
TFAP2B  
TFAP2C  
TFAP2D  
TFAP2E  
TFAP4  
TFCP2  
TFCP2L1  
TFDP1  
TFDP2  
TFDP3  
TFE3  
TFEB  
TFEC  
TGIF1  
TGIF2  
TGIF2LX  
TGIF2LY  
THAP1

THAP10  
THAP11  
THAP12  
THAP2  
THAP3  
THAP4  
THAP5  
THAP6  
THAP7  
THAP8  
THAP9  
THRA  
THRB  
THYN1  
TIGD1  
TIGD2  
TIGD3  
TIGD4  
TIGD5  
TIGD6  
TIGD7  
TLX1  
TLX2  
TLX3  
TMF1  
TOPORS  
TP53  
TP63  
TP73  
TPRX1  
TRAFD1  
TRERF1  
TRPS1  
TSC22D1  
TSHZ1  
TSHZ2  
TSHZ3  
TTF1  
TWIST1  
TWIST2  
UBP1  
UNCX  
USF1  
USF2  
USF3  
VAX1  
VAX2  
VDR  
VENTX  
VEZF1  
VSX1  
VSX2  
WIZ

WT1  
XBP1  
XPA  
YBX1  
YBX2  
YBX3  
YY1  
YY2  
ZBED1  
ZBED2  
ZBED3  
ZBED4  
ZBED5  
ZBED6  
ZBED9  
ZBTB1  
ZBTB10  
ZBTB11  
ZBTB12  
ZBTB14  
ZBTB16  
ZBTB17  
ZBTB18  
ZBTB2  
ZBTB20  
ZBTB21  
ZBTB22  
ZBTB24  
ZBTB25  
ZBTB26  
ZBTB3  
ZBTB32  
ZBTB33  
ZBTB34  
ZBTB37  
ZBTB38  
ZBTB39  
ZBTB4  
ZBTB40  
ZBTB41  
ZBTB42  
ZBTB43  
ZBTB44  
ZBTB45  
ZBTB46  
ZBTB47  
ZBTB48  
ZBTB49  
ZBTB5  
ZBTB6  
ZBTB7A  
ZBTB7B  
ZBTB7C

ZBTB8A  
ZBTB8B  
ZBTB9  
ZC3H8  
ZEB1  
ZEB2  
ZFAT  
ZFHX2  
ZFHX3  
ZFHX4  
ZFP1  
ZFP14  
ZFP2  
ZFP28  
ZFP3  
ZFP30  
ZFP37  
ZFP41  
ZFP42  
ZFP57  
ZFP62  
ZFP64  
ZFP69  
ZFP69B  
ZFP82  
ZFP90  
ZFP91  
ZFP92  
ZFPM1  
ZFPM2  
ZFX  
ZFY  
ZGLP1  
ZGPAT  
ZHX1  
ZHX2  
ZHX3  
ZIC1  
ZIC2  
ZIC3  
ZIC4  
ZIC5  
ZIK1  
ZIM2  
ZIM3  
ZKSCAN1  
ZKSCAN2  
ZKSCAN3  
ZKSCAN4  
ZKSCAN5  
ZKSCAN7  
ZKSCAN8  
ZMAT1

ZMAT4  
ZNF10  
ZNF100  
ZNF101  
ZNF107  
ZNF112  
ZNF114  
ZNF117  
ZNF12  
ZNF121  
ZNF124  
ZNF131  
ZNF132  
ZNF133  
ZNF134  
ZNF135  
ZNF136  
ZNF138  
ZNF14  
ZNF140  
ZNF141  
ZNF142  
ZNF143  
ZNF146  
ZNF148  
ZNF154  
ZNF155  
ZNF157  
ZNF16  
ZNF160  
ZNF165  
ZNF169  
ZNF17  
ZNF174  
ZNF175  
ZNF177  
ZNF18  
ZNF180  
ZNF181  
ZNF182  
ZNF184  
ZNF189  
ZNF19  
ZNF195  
ZNF197  
ZNF2  
ZNF20  
ZNF200  
ZNF202  
ZNF205  
ZNF207  
ZNF208  
ZNF211

ZNF212  
ZNF213  
ZNF214  
ZNF215  
ZNF217  
ZNF219  
ZNF22  
ZNF221  
ZNF222  
ZNF223  
ZNF224  
ZNF225  
ZNF226  
ZNF227  
ZNF229  
ZNF23  
ZNF230  
ZNF232  
ZNF233  
ZNF234  
ZNF235  
ZNF236  
ZNF239  
ZNF24  
ZNF248  
ZNF25  
ZNF250  
ZNF251  
ZNF253  
ZNF254  
ZNF256  
ZNF257  
ZNF26  
ZNF260  
ZNF263  
ZNF264  
ZNF266  
ZNF267  
ZNF268  
ZNF273  
ZNF274  
ZNF275  
ZNF276  
ZNF277  
ZNF28  
ZNF280A  
ZNF280B  
ZNF280C  
ZNF280D  
ZNF281  
ZNF282  
ZNF283  
ZNF284

ZNF285  
ZNF286A  
ZNF286B  
ZNF287  
ZNF292  
ZNF296  
ZNF3  
ZNF30  
ZNF300  
ZNF302  
ZNF304  
ZNF311  
ZNF316  
ZNF317  
ZNF318  
ZNF319  
ZNF32  
ZNF320  
ZNF322  
ZNF324  
ZNF324B  
ZNF326  
ZNF329  
ZNF331  
ZNF333  
ZNF334  
ZNF335  
ZNF337  
ZNF33A  
ZNF33B  
ZNF34  
ZNF341  
ZNF343  
ZNF345  
ZNF346  
ZNF347  
ZNF35  
ZNF350  
ZNF354A  
ZNF354B  
ZNF354C  
ZNF358  
ZNF362  
ZNF365  
ZNF366  
ZNF367  
ZNF37A  
ZNF382  
ZNF383  
ZNF384  
ZNF385A  
ZNF385B  
ZNF385C



ZNF385D  
ZNF391  
ZNF394  
ZNF395  
ZNF396  
ZNF397  
ZNF398  
ZNF404  
ZNF407  
ZNF408  
ZNF41  
ZNF410  
ZNF414  
ZNF415  
ZNF416  
ZNF417  
ZNF418  
ZNF419  
ZNF420  
ZNF423  
ZNF425  
ZNF426  
ZNF428  
ZNF429  
ZNF43  
ZNF430  
ZNF431  
ZNF432  
ZNF433  
ZNF436  
ZNF438  
ZNF439  
ZNF44  
ZNF440  
ZNF441  
ZNF442  
ZNF443  
ZNF444  
ZNF445  
ZNF446  
ZNF449  
ZNF45  
ZNF451  
ZNF454  
ZNF460  
ZNF461  
ZNF462  
ZNF467  
ZNF468  
ZNF469  
ZNF470  
ZNF471  
ZNF473

ZNF474  
ZNF479  
ZNF48  
ZNF480  
ZNF483  
ZNF484  
ZNF485  
ZNF486  
ZNF487  
ZNF488  
ZNF490  
ZNF491  
ZNF492  
ZNF493  
ZNF496  
ZNF497  
ZNF500  
ZNF501  
ZNF502  
ZNF503  
ZNF506  
ZNF507  
ZNF510  
ZNF511  
ZNF512  
ZNF512B  
ZNF513  
ZNF514  
ZNF516  
ZNF517  
ZNF518A  
ZNF518B  
ZNF519  
ZNF521  
ZNF524  
ZNF525  
ZNF526  
ZNF527  
ZNF528  
ZNF529  
ZNF530  
ZNF532  
ZNF534  
ZNF536  
ZNF540  
ZNF541  
ZNF543  
ZNF544  
ZNF546  
ZNF547  
ZNF548  
ZNF549  
ZNF550

ZNF551  
ZNF552  
ZNF554  
ZNF555  
ZNF556  
ZNF557  
ZNF558  
ZNF559  
ZNF560  
ZNF561  
ZNF562  
ZNF563  
ZNF564  
ZNF565  
ZNF566  
ZNF567  
ZNF568  
ZNF569  
ZNF57  
ZNF570  
ZNF571  
ZNF572  
ZNF573  
ZNF574  
ZNF575  
ZNF576  
ZNF577  
ZNF578  
ZNF579  
ZNF580  
ZNF581  
ZNF582  
ZNF583  
ZNF584  
ZNF585A  
ZNF585B  
ZNF586  
ZNF587  
ZNF587B  
ZNF589  
ZNF592  
ZNF594  
ZNF595  
ZNF596  
ZNF597  
ZNF598  
ZNF599  
ZNF600  
ZNF605  
ZNF606  
ZNF607  
ZNF608  
ZNF609

ZNF610  
ZNF611  
ZNF613  
ZNF614  
ZNF615  
ZNF616  
ZNF618  
ZNF619  
ZNF620  
ZNF621  
ZNF623  
ZNF624  
ZNF625  
ZNF626  
ZNF627  
ZNF628  
ZNF629  
ZNF630  
ZNF639  
ZNF641  
ZNF644  
ZNF645  
ZNF646  
ZNF648  
ZNF649  
ZNF652  
ZNF653  
ZNF654  
ZNF655  
ZNF658  
ZNF66  
ZNF660  
ZNF662  
ZNF664  
ZNF665  
ZNF667  
ZNF668  
ZNF669  
ZNF670  
ZNF671  
ZNF672  
ZNF674  
ZNF675  
ZNF676  
ZNF677  
ZNF678  
ZNF679  
ZNF680  
ZNF681  
ZNF682  
ZNF683  
ZNF684  
ZNF687

ZNF688  
ZNF689  
ZNF69  
ZNF691  
ZNF692  
ZNF695  
ZNF696  
ZNF697  
ZNF699  
ZNF7  
ZNF70  
ZNF700  
ZNF701  
ZNF703  
ZNF704  
ZNF705A  
ZNF705B  
ZNF705D  
ZNF705E  
ZNF705G  
ZNF706  
ZNF707  
ZNF708  
ZNF709  
ZNF71  
ZNF710  
ZNF711  
ZNF713  
ZNF714  
ZNF716  
ZNF717  
ZNF718  
ZNF721  
ZNF724  
ZNF726  
ZNF727  
ZNF728  
ZNF729  
ZNF730  
ZNF732  
ZNF735  
ZNF736  
ZNF737  
ZNF74  
ZNF740  
ZNF746  
ZNF747  
ZNF749  
ZNF750  
ZNF75A  
ZNF75D  
ZNF76  
ZNF761

ZNF763  
ZNF764  
ZNF765  
ZNF766  
ZNF768  
ZNF77  
ZNF770  
ZNF771  
ZNF772  
ZNF773  
ZNF774  
ZNF775  
ZNF776  
ZNF777  
ZNF778  
ZNF780A  
ZNF780B  
ZNF781  
ZNF782  
ZNF783  
ZNF784  
ZNF785  
ZNF786  
ZNF787  
ZNF788  
ZNF789  
ZNF79  
ZNF790  
ZNF791  
ZNF792  
ZNF793  
ZNF799  
ZNF8  
ZNF80  
ZNF800  
ZNF804A  
ZNF804B  
ZNF805  
ZNF808  
ZNF81  
ZNF813  
ZNF814  
ZNF816  
ZNF821  
ZNF823  
ZNF827  
ZNF829  
ZNF83  
ZNF830  
ZNF831  
ZNF835  
ZNF836  
ZNF837

ZNF84  
ZNF841  
ZNF843  
ZNF844  
ZNF845  
ZNF846  
ZNF85  
ZNF850  
ZNF852  
ZNF853  
ZNF860  
ZNF865  
ZNF878  
ZNF879  
ZNF880  
ZNF883  
ZNF888  
ZNF891  
ZNF90  
ZNF91  
ZNF92  
ZNF93  
ZNF98  
ZNF99  
ZSCAN1  
ZSCAN10  
ZSCAN12  
ZSCAN16  
ZSCAN18  
ZSCAN2  
ZSCAN20  
ZSCAN21  
ZSCAN22  
ZSCAN23  
ZSCAN25  
ZSCAN26  
ZSCAN29  
ZSCAN30  
ZSCAN31  
ZSCAN32  
ZSCAN4  
ZSCAN5A  
ZSCAN5B  
ZSCAN5C  
ZSCAN9  
ZUFSP  
ZXDA  
ZXDB  
ZXDC  
ZZZ3
