# Supplementary material for: Integrative Molecular Analyses of an Individual Transcription Factor-Based Genomic Model for Lung Cancer Prognosis
Source: Hindawi journal article supplement (doi:10.1155/2021/5125643), 2021-12-07
Supplement: f4 [file 5125643.f4.pdf]

Supplementary table 4. Determination of downstream targets of TFs: SATB2, HLF and NPAS2.

| TF  | Gene      | CHEA | ENCODE | JASPAR | MotifMap |
|-----|-----------|------|--------|--------|----------|
| HLF | NEUROD6   | 0    | 0      | 0      | 0        |
| HLF | PIK3R1    | 0    | 0      | 0      | 0        |
| HLF | TNF       | 0    | 0      | 1      | 0        |
| HLF | ENSA      | 0    | 0      | 0      | 0        |
| HLF | ZNF687    | 0    | 0      | 0      | 0        |
| HLF | AKTIP     | 0    | 0      | 0      | 0        |
| HLF | NFKBIZ    | 0    | 0      | 0      | 0        |
| HLF | MAP4      | 0    | 0      | 0      | 0        |
| HLF | ZDHHC14   | 0    | 0      | 0      | 0        |
| HLF | BEST3     | 0    | 0      | 0      | 0        |
| HLF | ALB       | 0    | 0      | 0      | 0        |
| HLF | MIR3648-1 | 0    | 0      | 1      | 0        |
| HLF | NBPF14    | 0    | 0      | 1      | 0        |
| HLF | BHLHE40   | 0    | 0      | 0      | 0        |
| HLF | TRIM26    | 0    | 0      | 1      | 0        |
| HLF | NYX       | 0    | 0      | 0      | 0        |
| HLF | DMD       | 0    | 0      | 0      | 0        |
| HLF | HCG26     | 0    | 0      | 1      | 0        |
| HLF | DCAF6     | 0    | 0      | 0      | 0        |
| HLF | TNNC2     | 0    | 0      | 0      | 0        |
| HLF | IRF2BP1   | 0    | 0      | 0      | 0        |
| HLF | IP6K2     | 0    | 0      | 0      | 0        |
| HLF | RBFOX2    | 0    | 0      | 0      | 0        |
| HLF | EPB41     | 0    | 0      | 0      | 0        |
| HLF | GTPBP6    | 0    | 0      | 1      | 0        |
| HLF | FBXO3     | 0    | 0      | 0      | 0        |
| HLF | AQP9      | 0    | 0      | 0      | 0        |
| HLF | CSNK1E    | 0    | 0      | 0      | 0        |
| HLF | LONRF3    | 0    | 0      | 0      | 0        |
| HLF | LOX       | 0    | 0      | 0      | 0        |
| HLF | LGSN      | 0    | 0      | 0      | 0        |
| HLF | ZFP57     | 0    | 0      | 1      | 0        |
| HLF | CDKN2C    | 0    | 0      | 0      | 0        |
| HLF | EPN2      | 0    | 0      | 0      | 0        |
| HLF | LIPI      | 0    | 0      | 1      | 0        |
| HLF | UBE2E2    | 0    | 0      | 0      | 0        |
| HLF | HERPUD1   | 0    | 0      | 0      | 0        |
| HLF | ABHD11    | 0    | 0      | 0      | 0        |
| HLF | DDX39B    | 0    | 0      | 1      | 0        |
| HLF | PDAP1     | 0    | 0      | 0      | 0        |
| HLF | ATAD2     | 0    | 0      | 0      | 0        |
| HLF | HOXA4     | 0    | 0      | 0      | 0        |
| HLF | FOXA1     | 0    | 0      | 0      | 0        |
| HLF | ANKRD40   | 0    | 0      | 0      | 0        |
| HLF | ARRDC3    | 0    | 0      | 0      | 0        |
| HLF | MECP2     | 0    | 0      | 0      | 0        |
| HLF | SLC24A2   | 0    | 0      | 0      | 0        |
| HLF | PNMA1     | 0    | 0      | 0      | 0        |
| HLF | MEOX2     | 0    | 0      | 0      | 0        |
| HLF | CD40LG    | 0    | 0      | 0      | 0        |
| HLF | HS6ST2    | 0    | 0      | 0      | 0        |

|     |          |   |   |   |   |
|-----|----------|---|---|---|---|
| HLF | HOXD9    | 0 | 0 | 1 | 0 |
| HLF | REXO1L1P | 0 | 0 | 1 | 0 |
| HLF | CHST2    | 0 | 0 | 1 | 0 |
| HLF | TENC1    | 0 | 0 | 0 | 0 |
| HLF | PRKAA2   | 0 | 0 | 0 | 0 |
| HLF | FCHSD2   | 0 | 0 | 0 | 0 |
| HLF | HNRNPH1  | 0 | 0 | 0 | 0 |
| HLF | SMARCAD1 | 0 | 0 | 0 | 0 |
| HLF | FOXA2    | 0 | 0 | 0 | 0 |
| HLF | SLIT3    | 0 | 0 | 0 | 0 |
| HLF | CYP26A1  | 0 | 0 | 0 | 0 |
| HLF | NR2F2    | 0 | 0 | 0 | 0 |
| HLF | ZBTB18   | 0 | 0 | 0 | 0 |
| HLF | PDGFRL   | 0 | 0 | 0 | 0 |
| HLF | ACSL4    | 0 | 0 | 0 | 0 |
| HLF | S100PBP  | 0 | 0 | 0 | 0 |
| HLF | IL4      | 0 | 0 | 0 | 0 |
| HLF | ABHD8    | 0 | 0 | 0 | 0 |
| HLF | HOXB6    | 0 | 0 | 0 | 0 |
| HLF | PHC3     | 0 | 0 | 0 | 0 |
| HLF | NREP     | 0 | 0 | 0 | 0 |
| HLF | YWHAG    | 0 | 0 | 0 | 0 |
| HLF | RMDN3    | 0 | 0 | 0 | 0 |
| HLF | VNN3     | 0 | 0 | 0 | 0 |
| HLF | HNRNPA3  | 0 | 0 | 0 | 0 |
| HLF | IFNG     | 0 | 0 | 0 | 0 |
| HLF | CLCN5    | 0 | 0 | 0 | 0 |
| HLF | PPL      | 0 | 0 | 0 | 0 |
| HLF | NAA60    | 0 | 0 | 0 | 0 |
| HLF | HIVEP3   | 0 | 0 | 0 | 0 |
| HLF | OTP      | 0 | 0 | 0 | 0 |
| HLF | TRIM40   | 0 | 0 | 1 | 0 |
| HLF | TNXB     | 0 | 0 | 1 | 0 |
| HLF | FOXP1    | 0 | 0 | 0 | 0 |
| HLF | TFEB     | 0 | 0 | 0 | 0 |
| HLF | ROBO1    | 0 | 0 | 0 | 0 |
| HLF | TAGLN3   | 0 | 0 | 0 | 0 |
| HLF | EGFR     | 0 | 0 | 0 | 0 |
| HLF | SLC25A26 | 0 | 0 | 1 | 0 |
| HLF | TREX1    | 0 | 0 | 0 | 0 |
| HLF | ADNP     | 0 | 0 | 0 | 0 |
| HLF | OR5T3    | 0 | 0 | 1 | 0 |
| HLF | ZDHHC16  | 0 | 0 | 1 | 0 |
| HLF | CHN1     | 0 | 0 | 0 | 0 |
| HLF | DPH3     | 0 | 0 | 0 | 0 |
| HLF | MPP6     | 0 | 0 | 0 | 0 |
| HLF | CTDSP1   | 0 | 0 | 0 | 0 |
| HLF | KRT23    | 0 | 0 | 0 | 0 |
| HLF | RASGEF1A | 0 | 0 | 0 | 0 |
| HLF | TXLNG    | 0 | 0 | 0 | 0 |
| HLF | ELMOD1   | 0 | 0 | 0 | 0 |
| HLF | TMEM154  | 0 | 0 | 0 | 0 |
| HLF | PLCB1    | 0 | 0 | 0 | 0 |

|     |                 |   |   |   |   |
|-----|-----------------|---|---|---|---|
| HLF | MIOX            | 0 | 0 | 0 | 0 |
| HLF | ZBTB21          | 0 | 0 | 0 | 0 |
| HLF | CELF2           | 0 | 0 | 0 | 0 |
| HLF | FCGR1B          | 0 | 0 | 1 | 0 |
| HLF | ETV4            | 0 | 0 | 0 | 0 |
| HLF | GRHL2           | 0 | 0 | 0 | 0 |
| HLF | TSC22D3         | 0 | 0 | 0 | 0 |
| HLF | POGZ            | 0 | 0 | 0 | 0 |
| HLF | ARHGAP44        | 0 | 0 | 0 | 0 |
| HLF | ZNF711          | 0 | 0 | 0 | 0 |
| HLF | CDH10           | 0 | 0 | 0 | 0 |
| HLF | OXNAD1          | 0 | 0 | 0 | 0 |
| HLF | FGF21           | 0 | 0 | 0 | 0 |
| HLF | RHOBTB2         | 0 | 0 | 0 | 0 |
| HLF | GTPBP2          | 0 | 0 | 0 | 0 |
| HLF | CACNG2          | 0 | 0 | 0 | 0 |
| HLF | PIP5K1A         | 0 | 0 | 0 | 0 |
| HLF | EHMT2           | 0 | 0 | 1 | 0 |
| HLF | SPIB            | 0 | 0 | 0 | 0 |
| HLF | JPH3            | 0 | 0 | 0 | 0 |
| HLF | ZDHHC5          | 0 | 0 | 0 | 0 |
| HLF | PDP1            | 0 | 0 | 0 | 0 |
| HLF | RPS6KA3         | 0 | 0 | 0 | 0 |
| HLF | HOXC4           | 0 | 0 | 0 | 0 |
| HLF | SPRR1B          | 0 | 0 | 0 | 0 |
| HLF | HCP5            | 0 | 0 | 1 | 0 |
| HLF | XPO7            | 0 | 0 | 0 | 0 |
| HLF | NEUROD1         | 0 | 0 | 0 | 0 |
| HLF | NTRK1           | 0 | 0 | 0 | 0 |
| HLF | ALDH1A1         | 0 | 0 | 0 | 0 |
| HLF | GPR112          | 0 | 0 | 0 | 0 |
| HLF | EML4            | 0 | 0 | 0 | 0 |
| HLF | SECISBP2L       | 0 | 0 | 0 | 0 |
| HLF | NEU1            | 0 | 0 | 1 | 0 |
| HLF | NPVF            | 0 | 0 | 0 | 0 |
| HLF | ANO1            | 0 | 0 | 0 | 0 |
| HLF | ANGPTL1         | 0 | 0 | 0 | 0 |
| HLF | CTSC            | 0 | 0 | 0 | 0 |
| HLF | CHD2            | 0 | 0 | 0 | 0 |
| HLF | TNFSF13         | 0 | 0 | 0 | 0 |
| HLF | RNF38           | 0 | 0 | 1 | 0 |
| HLF | CDKL5           | 0 | 0 | 0 | 0 |
| HLF | TTC39B          | 0 | 0 | 0 | 0 |
| HLF | ZFYVE9          | 0 | 0 | 0 | 0 |
| HLF | KLF9            | 0 | 0 | 0 | 0 |
| HLF | CDC42           | 0 | 0 | 0 | 0 |
| HLF | LRRTM4          | 0 | 0 | 0 | 0 |
| HLF | FNBP1           | 0 | 0 | 0 | 0 |
| HLF | IL27            | 0 | 0 | 0 | 0 |
| HLF | CLIC4           | 0 | 0 | 0 | 0 |
| HLF | INPP4A          | 0 | 0 | 0 | 0 |
| HLF | ATP6V1G2-DDX39B | 0 | 0 | 1 | 0 |
| HLF | PCBP2           | 0 | 0 | 0 | 0 |

|     |           |   |   |   |   |
|-----|-----------|---|---|---|---|
| HLF | FAIM2     | 0 | 0 | 0 | 0 |
| HLF | SHMT2     | 0 | 0 | 0 | 0 |
| HLF | PFN2      | 0 | 0 | 0 | 0 |
| HLF | LINC00518 | 0 | 0 | 1 | 0 |
| HLF | LSM2      | 0 | 0 | 1 | 0 |
| HLF | CADM1     | 0 | 0 | 0 | 0 |
| HLF | ZDHHC2    | 0 | 0 | 0 | 0 |
| HLF | BUD31     | 0 | 0 | 0 | 0 |
| HLF | SPRED1    | 0 | 0 | 0 | 0 |
| HLF | TSC22D1   | 0 | 0 | 0 | 0 |
| HLF | KLHL7     | 0 | 0 | 0 | 0 |
| HLF | NDST3     | 0 | 0 | 0 | 0 |
| HLF | STK35     | 0 | 0 | 0 | 0 |
| HLF | CALM1     | 0 | 0 | 0 | 0 |
| HLF | CALCRL    | 0 | 0 | 0 | 0 |
| HLF | DNAJA2    | 0 | 0 | 0 | 0 |
| HLF | ELAVL4    | 0 | 0 | 0 | 0 |
| HLF | PTHLH     | 0 | 0 | 0 | 0 |
| HLF | WNT3A     | 0 | 0 | 0 | 0 |
| HLF | RORA      | 0 | 0 | 0 | 0 |
| HLF | CDK8      | 0 | 0 | 0 | 0 |
| HLF | TMEM57    | 0 | 0 | 0 | 0 |
| HLF | SREBF2    | 0 | 0 | 0 | 0 |
| HLF | ARID1B    | 0 | 0 | 0 | 0 |
| HLF | AP1S2     | 0 | 0 | 0 | 0 |
| HLF | GBX2      | 0 | 0 | 0 | 0 |
| HLF | LGALS1    | 0 | 0 | 0 | 0 |
| HLF | FRS3      | 0 | 0 | 1 | 0 |
| HLF | USP9X     | 0 | 0 | 0 | 0 |
| HLF | LOC388942 | 0 | 0 | 1 | 0 |
| HLF | FLOT1     | 0 | 0 | 1 | 0 |
| HLF | BAMBI     | 0 | 0 | 0 | 0 |
| HLF | NFIL3     | 0 | 0 | 0 | 0 |
| HLF | PKNOX2    | 0 | 0 | 0 | 0 |
| HLF | EYA1      | 0 | 0 | 1 | 0 |
| HLF | SEMA6D    | 0 | 0 | 0 | 0 |
| HLF | DDX5      | 0 | 0 | 0 | 0 |
| HLF | OSBPL6    | 0 | 0 | 0 | 0 |
| HLF | DLX1      | 0 | 0 | 0 | 0 |
| HLF | SETD7     | 0 | 0 | 0 | 0 |
| HLF | RUNX1     | 0 | 0 | 0 | 0 |
| HLF | PRKG1     | 0 | 0 | 0 | 0 |
| HLF | ZNF641    | 0 | 0 | 1 | 0 |
| HLF | PRRC2A    | 0 | 0 | 1 | 0 |
| HLF | CLASP1    | 0 | 0 | 0 | 0 |
| HLF | SULF1     | 0 | 0 | 0 | 0 |
| HLF | PLAG1     | 0 | 0 | 0 | 0 |
| HLF | XK        | 0 | 0 | 0 | 0 |
| HLF | HSPA4L    | 0 | 0 | 0 | 0 |
| HLF | RARB      | 0 | 0 | 1 | 0 |
| HLF | TCEAL7    | 0 | 0 | 0 | 0 |
| HLF | PDE4D     | 0 | 0 | 0 | 0 |
| HLF | TOP1      | 0 | 0 | 0 | 0 |

|     |           |   |   |   |   |
|-----|-----------|---|---|---|---|
| HLF | CREB5     | 0 | 0 | 0 | 0 |
| HLF | RBFOX1    | 0 | 0 | 0 | 0 |
| HLF | MYL6B     | 0 | 0 | 0 | 0 |
| HLF | DLX5      | 0 | 0 | 0 | 0 |
| HLF | HRH3      | 0 | 0 | 0 | 0 |
| HLF | FAM21A    | 0 | 0 | 1 | 0 |
| HLF | NUFIP2    | 0 | 0 | 0 | 0 |
| HLF | SUMO1     | 0 | 0 | 0 | 0 |
| HLF | DENND4A   | 0 | 0 | 0 | 0 |
| HLF | TCF19     | 0 | 0 | 1 | 0 |
| HLF | SSBP2     | 0 | 0 | 1 | 0 |
| HLF | GPR89B    | 0 | 0 | 1 | 0 |
| HLF | RPRD2     | 0 | 0 | 0 | 0 |
| HLF | HIST3H2BB | 0 | 0 | 0 | 0 |
| HLF | PELI2     | 0 | 0 | 0 | 0 |
| HLF | MIR30B    | 0 | 0 | 1 | 0 |
| HLF | POU4F1    | 0 | 0 | 0 | 0 |
| HLF | FBXW4     | 0 | 0 | 0 | 0 |
| HLF | FOXO3     | 0 | 0 | 0 | 0 |
| HLF | PDXP      | 0 | 0 | 0 | 0 |
| HLF | CXCL6     | 0 | 0 | 0 | 0 |
| HLF | SPRY4     | 0 | 0 | 0 | 0 |
| HLF | BRD2      | 0 | 0 | 1 | 0 |
| HLF | PARP4     | 0 | 0 | 1 | 0 |
| HLF | PDZD8     | 0 | 0 | 0 | 0 |
| HLF | MAP2K6    | 0 | 0 | 0 | 0 |
| HLF | SH2B3     | 0 | 0 | 0 | 0 |
| HLF | DBP       | 0 | 0 | 0 | 0 |
| HLF | HOXC6     | 0 | 0 | 0 | 0 |
| HLF | LINC00114 | 0 | 0 | 0 | 0 |
| HLF | HIST3H2A  | 0 | 0 | 0 | 0 |
| HLF | MPP2      | 0 | 0 | 0 | 0 |
| HLF | RGR       | 0 | 0 | 0 | 0 |
| HLF | BAI3      | 0 | 0 | 0 | 0 |
| HLF | GCN1L1    | 0 | 0 | 1 | 0 |
| HLF | PCSK2     | 0 | 0 | 0 | 0 |
| HLF | MRC2      | 0 | 0 | 0 | 0 |
| HLF | AGO3      | 0 | 0 | 0 | 0 |
| HLF | DDIT3     | 0 | 0 | 0 | 0 |
| HLF | C12ORF65  | 0 | 0 | 1 | 0 |
| HLF | C9ORF24   | 0 | 0 | 0 | 0 |
| HLF | USP2      | 0 | 0 | 0 | 0 |
| HLF | PREX2     | 0 | 0 | 0 | 0 |
| HLF | CCDC47    | 0 | 0 | 0 | 0 |
| HLF | OCRL      | 0 | 0 | 0 | 0 |
| HLF | CRIM1     | 0 | 0 | 0 | 0 |
| HLF | CDYL      | 0 | 0 | 0 | 0 |
| HLF | PRKAG1    | 0 | 0 | 0 | 0 |
| HLF | CASS4     | 0 | 0 | 0 | 0 |
| HLF | MILR1     | 0 | 0 | 1 | 0 |
| HLF | LEMD2     | 0 | 0 | 0 | 0 |
| HLF | CACNA2D3  | 0 | 0 | 0 | 0 |
| HLF | ERF       | 0 | 0 | 0 | 0 |

|       |           |   |   |   |   |
|-------|-----------|---|---|---|---|
| HLF   | F5        | 0 | 0 | 0 | 0 |
| HLF   | ING1      | 0 | 0 | 0 | 0 |
| HLF   | LINC00685 | 0 | 0 | 1 | 0 |
| HLF   | REXO1L2P  | 0 | 0 | 1 | 0 |
| HLF   | ZNF654    | 0 | 0 | 0 | 0 |
| HLF   | MIR3687-1 | 0 | 0 | 1 | 0 |
| HLF   | MBNL2     | 0 | 0 | 0 | 0 |
| HLF   | FAM101B   | 0 | 0 | 1 | 0 |
| HLF   | MEIS2     | 0 | 0 | 0 | 0 |
| HLF   | CDX2      | 0 | 0 | 1 | 0 |
| HLF   | CASK      | 0 | 0 | 0 | 0 |
| HLF   | BSN       | 0 | 0 | 0 | 0 |
| HLF   | TBX6      | 0 | 0 | 0 | 0 |
| HLF   | MKNK2     | 0 | 0 | 0 | 0 |
| HLF   | LOC401242 | 0 | 0 | 1 | 0 |
| HLF   | TOB1      | 0 | 0 | 0 | 0 |
| HLF   | CNTF      | 0 | 0 | 0 | 0 |
| HLF   | DUSP14    | 0 | 0 | 0 | 0 |
| HLF   | HLA-E     | 0 | 0 | 1 | 0 |
| HLF   | TNFSF15   | 0 | 0 | 0 | 0 |
| HLF   | ECM2      | 0 | 0 | 0 | 0 |
| HLF   | RCC2      | 0 | 0 | 0 | 0 |
| HLF   | ELMSAN1   | 0 | 0 | 0 | 0 |
| HLF   | SYT11     | 0 | 0 | 0 | 0 |
| HLF   | VAR5      | 0 | 0 | 1 | 0 |
| HLF   | EIF4A1    | 0 | 0 | 0 | 0 |
| HLF   | ATXN1     | 0 | 0 | 0 | 0 |
| HLF   | EEF2      | 0 | 0 | 0 | 0 |
| HLF   | CYP21A2   | 0 | 0 | 1 | 0 |
| HLF   | NAPEPLD   | 0 | 0 | 0 | 0 |
| HLF   | TRIM8     | 0 | 0 | 0 | 0 |
| HLF   | SERTAD4   | 0 | 0 | 0 | 0 |
| HLF   | ZBTB12    | 0 | 0 | 0 | 0 |
| HLF   | ADRB2     | 0 | 0 | 0 | 0 |
| HLF   | OTX2      | 0 | 0 | 0 | 0 |
| HLF   | NR1D1     | 0 | 0 | 0 | 0 |
| HLF   | GNL1      | 0 | 0 | 1 | 0 |
| HLF   | TAC1      | 0 | 0 | 0 | 0 |
| HLF   | COL15A1   | 0 | 0 | 0 | 0 |
| HLF   | RNF39     | 0 | 0 | 1 | 0 |
| HLF   | BCL6      | 0 | 0 | 0 | 0 |
| HLF   | KRTAP19-5 | 0 | 0 | 0 | 0 |
| HLF   | NPTX1     | 0 | 0 | 0 | 0 |
| HLF   | RASL10B   | 0 | 0 | 0 | 0 |
| NPAS2 | CRY2      | 0 | 0 | 0 | 0 |
| NPAS2 | PER1      | 0 | 0 | 0 | 0 |
| NPAS2 | PER2      | 0 | 0 | 0 | 0 |
| NPAS2 | CRY1      | 0 | 0 | 0 | 0 |
| SATB2 | UPF3B     | 0 | 0 | 0 | 0 |
| SATB2 | TP63      | 0 | 0 | 0 | 0 |

[illegible]

[illegible]



|   |   |   |
|---|---|---|
| 1 | 0 | 1 |
| 1 | 0 | 1 |
| 1 | 0 | 1 |
| 0 | 0 | 1 |
| 1 | 0 | 1 |
| 1 | 0 | 1 |
| 1 | 0 | 1 |
| 1 | 0 | 1 |
| 1 | 0 | 1 |
| 1 | 0 | 1 |
| 1 | 0 | 1 |
| 1 | 0 | 1 |
| 1 | 0 | 1 |
| 1 | 0 | 1 |
| 1 | 0 | 1 |
| 1 | 0 | 1 |
| 1 | 0 | 1 |
| 1 | 0 | 1 |
| 0 | 0 | 1 |
| 1 | 0 | 1 |
| 1 | 0 | 1 |
| 1 | 0 | 1 |
| 1 | 0 | 1 |
| 1 | 0 | 1 |
| 1 | 0 | 1 |
| 1 | 0 | 1 |
| 1 | 0 | 1 |
| 1 | 0 | 1 |
| 0 | 0 | 1 |
| 1 | 0 | 1 |
| 1 | 0 | 1 |
| 1 | 0 | 1 |
| 1 | 0 | 1 |
| 1 | 0 | 1 |
| 1 | 0 | 1 |
| 1 | 0 | 1 |
| 0 | 0 | 1 |
| 1 | 0 | 1 |
| 1 | 0 | 1 |
| 1 | 0 | 1 |
| 1 | 0 | 1 |
| 1 | 0 | 1 |
| 1 | 0 | 1 |
| 0 | 0 | 1 |
| 1 | 0 | 1 |
| 1 | 0 | 1 |
| 1 | 0 | 1 |
| 1 | 0 | 1 |
| 1 | 0 | 1 |
| 1 | 0 | 1 |
| 1 | 0 | 1 |
| 1 | 0 | 1 |
| 1 | 0 | 1 |
| 1 | 0 | 1 |
| 1 | 0 | 1 |
| 0 | 0 | 1 |
| 1 | 0 | 1 |

[illegible]

|   |   |   |
|---|---|---|
| 1 | 0 | 1 |
| 1 | 0 | 1 |
| 1 | 0 | 1 |
| 1 | 0 | 1 |
| 1 | 0 | 1 |
| 0 | 0 | 1 |
| 1 | 0 | 1 |
| 1 | 0 | 1 |
| 1 | 0 | 1 |
| 0 | 0 | 1 |
| 0 | 0 | 1 |
| 0 | 0 | 1 |
| 1 | 0 | 1 |
| 1 | 0 | 1 |
| 1 | 0 | 1 |
| 0 | 0 | 1 |
| 1 | 0 | 1 |
| 1 | 0 | 1 |
| 1 | 0 | 1 |
| 1 | 0 | 1 |
| 1 | 0 | 1 |
| 0 | 0 | 1 |
| 0 | 0 | 1 |
| 1 | 0 | 1 |
| 1 | 0 | 1 |
| 1 | 0 | 1 |
| 0 | 1 | 1 |
| 1 | 0 | 1 |
| 1 | 0 | 1 |
| 1 | 0 | 1 |
| 1 | 0 | 1 |
| 1 | 0 | 1 |
| 1 | 0 | 1 |
| 0 | 0 | 1 |
| 1 | 0 | 1 |
| 1 | 0 | 1 |
| 1 | 0 | 1 |
| 1 | 0 | 1 |
| 0 | 0 | 1 |
| 1 | 0 | 1 |
| 1 | 0 | 1 |
| 1 | 0 | 1 |
| 1 | 0 | 1 |
| 1 | 0 | 1 |
| 1 | 0 | 1 |
| 1 | 0 | 1 |
| 1 | 0 | 1 |
| 1 | 0 | 1 |
| 1 | 0 | 1 |
| 1 | 0 | 1 |
| 0 | 0 | 1 |
| 1 | 0 | 1 |
| 1 | 0 | 1 |
| 1 | 0 | 1 |

[illegible]
